# Supplementary material
Source: publisher site journal article supplement (https://www.dovepress.com/article/455006)
Supplement: Supplementary file 1 [file get_supplementary_file.php]

**Table S1** Molecular docking results of nine key genes and six main compounds

| **Serial number** | **Composition** | **Structure** | **Target**  **(RCSB PDB ID)** | **Binding Energy**  **(kcal/mol)** |
| --- | --- | --- | --- | --- |
| 1 | quercetin | 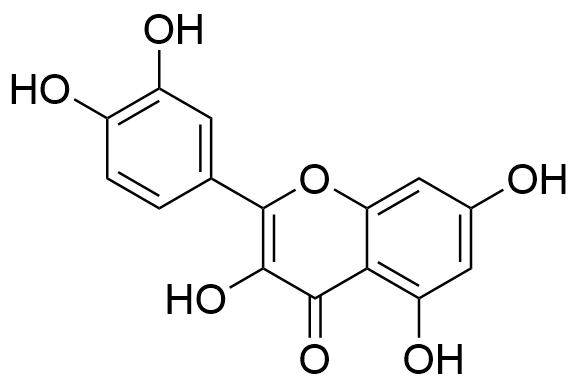 | JUN(5T01)  RELA(5U4K)  TP53(2MWP)  MAPK1(5WP1)  FOS(1S9K)  ESR1(6VIG)  MAPK14(6ZWP)  MYC(5I4Z)  HIF1A(5JWP) | -3.73  -3.85  -4.58  -4.23  -3.56  -3.27  -2.41  -2.89  -0.71 |
| 2 | kaempferol | 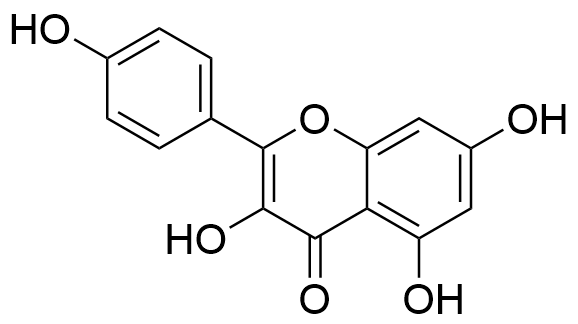 | JUN(5T01)  RELA(5U4K)  TP53(2MWP)  MAPK1(5WP1)  FOS(1S9K)  ESR1(6VIG)  MAPK14(6ZWP)  MYC(5I4Z)  HIF1A(5JWP) | -3.76  -4.73  -5.24  -4.93  -3.81  -2.89  -3.08  -3.56  -2.14 |
| 3 | wogonin | 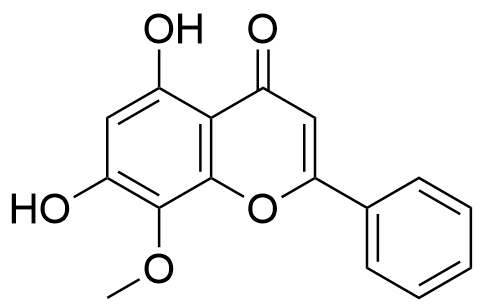 | JUN(5T01)  RELA(5U4K)  TP53(2MWP)  MAPK1(5WP1)  FOS(1S9K)  ESR1(6VIG)  MAPK14(6ZWP)  MYC(5I4Z)  HIF1A(5JWP) | -4.15  -3.82  -4.71  -4.58  -4.16  -3.22  -3.09  -2.14  -2.53 |
| 4 | baicalein | 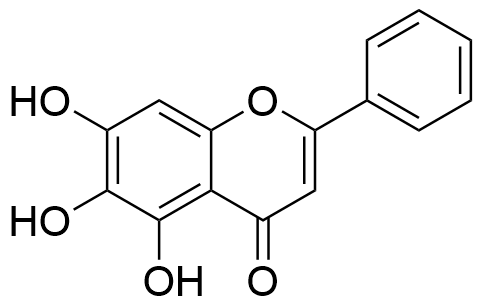 | JUN(5T01)  RELA(5U4K)  TP53(2MWP)  MAPK1(5WP1)  FOS(1S9K)  ESR1(6VIG)  MAPK14(6ZWP)  MYC(5I4Z)  HIF1A(5JWP) | -4.75  -3.98  -4.87  -4.00  -4.37  -3.27  -3.46  -1.46  -2.33 |
| 5 | beta-sitosterol | 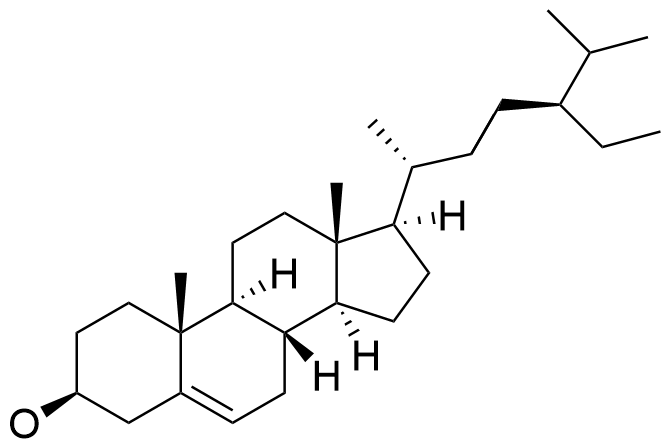 | JUN(5T01)  RELA(5U4K)  TP53(2MWP)  MAPK1(5WP1)  FOS(1S9K)  ESR1(6VIG)  MAPK14(6ZWP)  MYC(5I4Z)  HIF1A(5JWP) | -5.84  -5.43  -5.41  -5.41  -6.67  -4.76  -5.45  -2.89  -1.87 |
| 6 | stigmasterol | 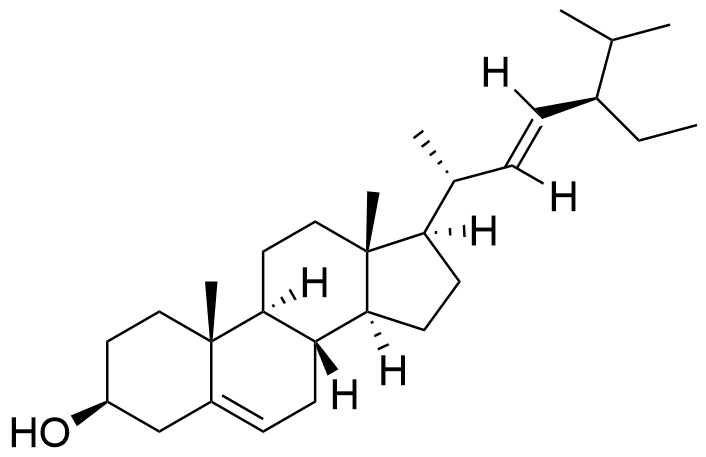 | JUN(5T01)  RELA(5U4K)  TP53(2MWP)  MAPK1(5WP1)  FOS(1S9K)  ESR1(6VIG)  MAPK14(6ZWP)  MYC(5I4Z)  HIF1A(5JWP) | -5.92  -4.78  -5.62  -7.54  -5.68  -4.57  -3.69  -2.80  -3.02 |


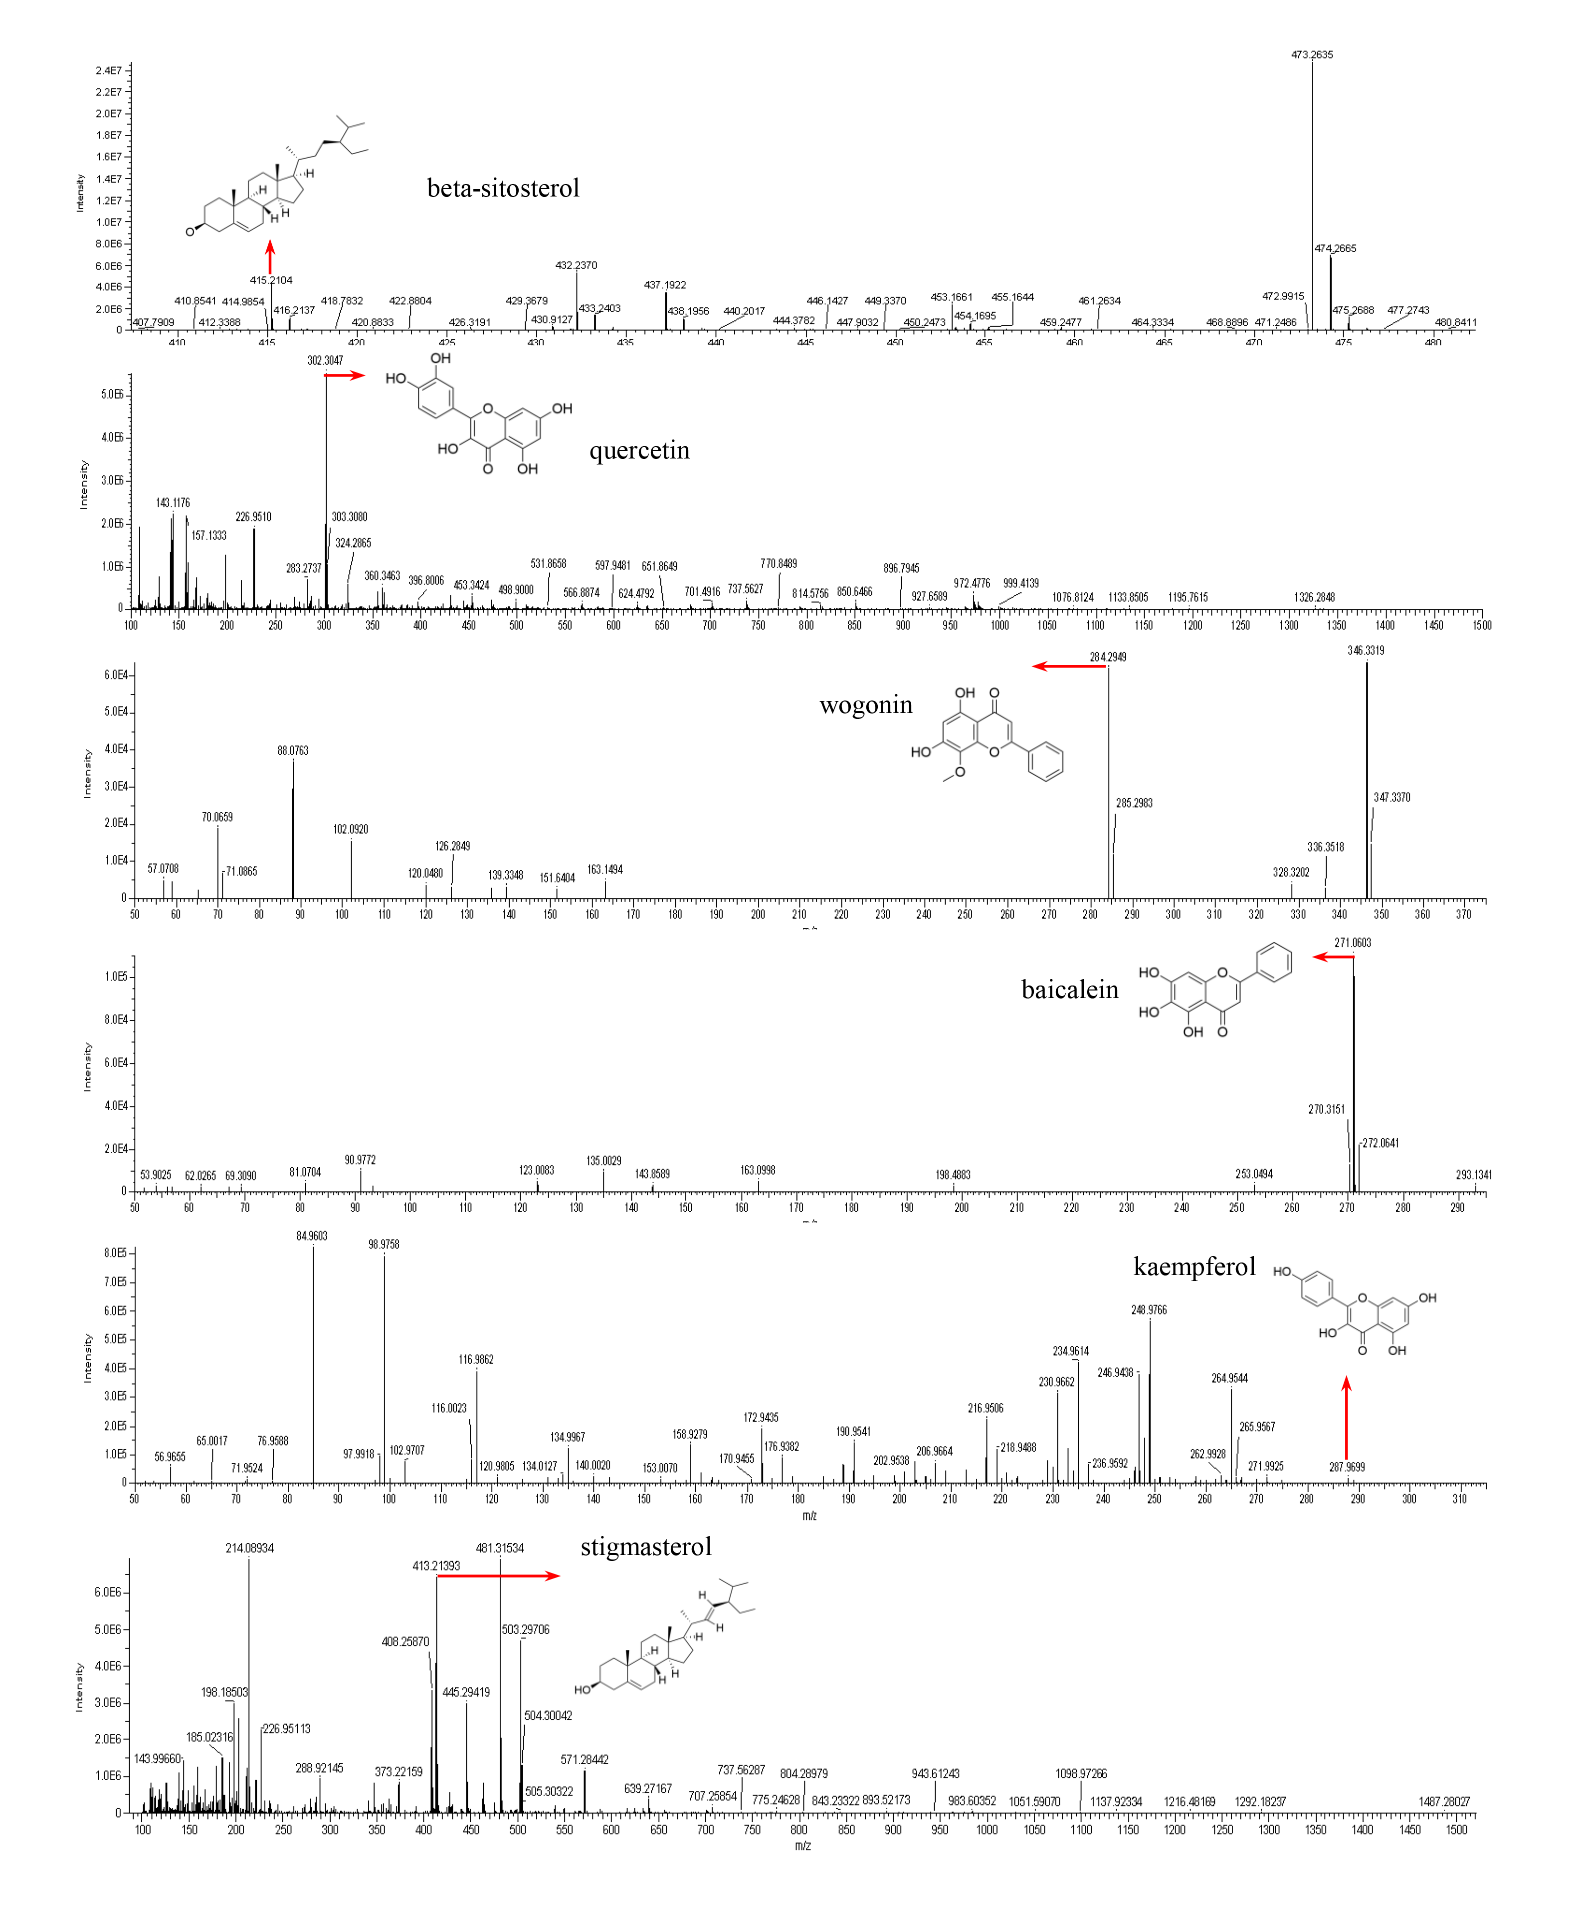


**Figure S1.** Six main active components in RAR were identified by HPLC-MS/MS-based analysis. The red arrows represent six identified compounds.
